# Supplementary material for: Production of Interleukin-20 cytokines limits bacterial clearance and lung inflammation during infection by Streptococcus pneumoniae
Source: PubMed Central journal article supplement — eBioMedicine. 2018 Oct 22;37:417–27. doi: 10.1016/j.ebiom.2018.10.031 (PMC6284423; doi:10.1016/j.ebiom.2018.10.031), 2018-10-22

# **Production of IL-20 cytokines limits bacterial clearance and lung inflammation during infection by *Streptococcus pneumoniae*.**

Fahima Madouri<sup>1, 2, 3, 4\*</sup>, Olivia Barada<sup>1, 2, 3, 4\*</sup>, Gwenola Kervoaze<sup>1, 2, 3, 4</sup>, François Trottein<sup>1, 2, 3, 4</sup>, Muriel Pichavant<sup>1, 2, 3, 4</sup>, Philippe Gosset<sup>1, 2, 3, 4</sup>

<sup>1</sup>Institut Pasteur de Lille, Centre d'Infection et d'Immunité de Lille, 59019 Lille, France

<sup>2</sup>Université Lille Nord de France, 59000 Lille, France

<sup>3</sup>Centre National de la Recherche Scientifique, UMR 8204, 59021 Lille, France

<sup>4</sup>Institut National de la Santé et de la Recherche Médicale, U1019, 59019 Lille, France  
CHRU de Lille, 59000 Lille, France

\* Equal contribution for both authors

**Short title:** IL-20 cytokines in pneumonia

## **Supplementary Tables and Figures**

**Supplementary Table 1: Lung injury scoring.**

The cumulative score ranged from 0 to 30 was evaluated in a blind fashion.

| Lung injury                        | Score   |                           |                |                |            |
|------------------------------------|---------|---------------------------|----------------|----------------|------------|
| Scale                              | 0       | 1                         | 2              | 3              | 4          |
| Extent of lung injury              | Absence | <25 %                     | 26 to 50 %     | 51 to 75 %     | >75 %      |
| Alveolar wall thickness            | ≤ 1 rbc | > 1 ≤ 2 rbc               | 3 to 5 rbc     | 6 to 10 rbc    | > 10 rbc   |
| Hyaline membranes                  | Absence | Presence                  | NA             | NA             | NA         |
| Neutrophilic alveolitis            | Absence | <10 neutrophils/HPF       | 10 to 20 / HPF | 21 to 50 / HPF | > 50 / HPF |
| Suppuration                        | Absence | Presence                  | NA             | NA             | NA         |
| Bronchial epithelial degeneration  | Absence | Presence                  | NA             | NA             | NA         |
| Neutrophilic peribronchitis        | Absence | <10 neutrophils/HPF       | 10 to 20 / HPF | 21 to 50 / HPF | > 50 / HPF |
| Lympho- histiocytic peribronchitis | Absence | <10 mononuclear cells/HPF | 10 to 20 / HPF | 21 to 50 / HPF | > 50 / HPF |
| Vasculitis                         | Absence | Presence                  | NA             | NA             | NA         |

Abbreviations: rbc: red blood cell; HPF: high power field; NA: not applicable

**Supplementary Table 2: Sequence of primer used for RT-qPCR**

Forward and reverse sequences of primer used during RT-qPCR experiment are represented in this table.

| Target        | Primer  | Sequence                   |
|---------------|---------|----------------------------|
| Mouse GAPDH   | Forward | 5'-TGTTTCCTCGTCCCGTAGACAA  |
|               | Reverse | 5'-GGCAACAATCTCCACTTTGCC   |
| Mouse IL-19   | Forward | 5'-TGGTGCTGCATGACCAACAA    |
|               | Reverse | 5'-GGCAATGCTGCTGATTCTCCT   |
| Mouse IL-20   | Forward | 5'-TCTGCCTTTGGACTGTTCTCC   |
|               | Reverse | 5'-GTTTGCAGTAATCACACAGCTTC |
| Mouse IL-22   | Forward | 5'-AGCCGGACGTCTGTGTTGTTA   |
|               | Reverse | 5'-TTGAGGTGTCCAACCTCCAGCA  |
| Mouse IL-24   | Forward | 5'-CCACTCTGGCCAACAACCTCAT  |
|               | Reverse | 5'-TCTGCGGAACAGCAAAAACC    |
| Mouse IL-20Ra | Forward | 5'-CTGGCCGCTTCGGGACGC      |
|               | Reverse | 5'-AACCACAGACACAAGGAACTG   |
| Mouse IL-20Rb | Forward | 5'-CAGGTGCTTCCAGTCCGTCT    |
|               | Reverse | 5'-CTCTCCTGGAATCCCCAAAGT   |
| Mouse IL-22Ra | Forward | 5'-ATATTGTCCAAGGAAAGTGCCC  |
|               | Reverse | 5'-AGCCGACGAGGAAACCCAT     |

**Supplementary Figure 1:**

Gating strategy in order to identify NKT cells, Alveolar macrophages (AM), neutrophils and dendritic cells (DC) (Cdc1 (DC CD11b<sup>+</sup>) and cDC2 (DC CD103<sup>+</sup>)).

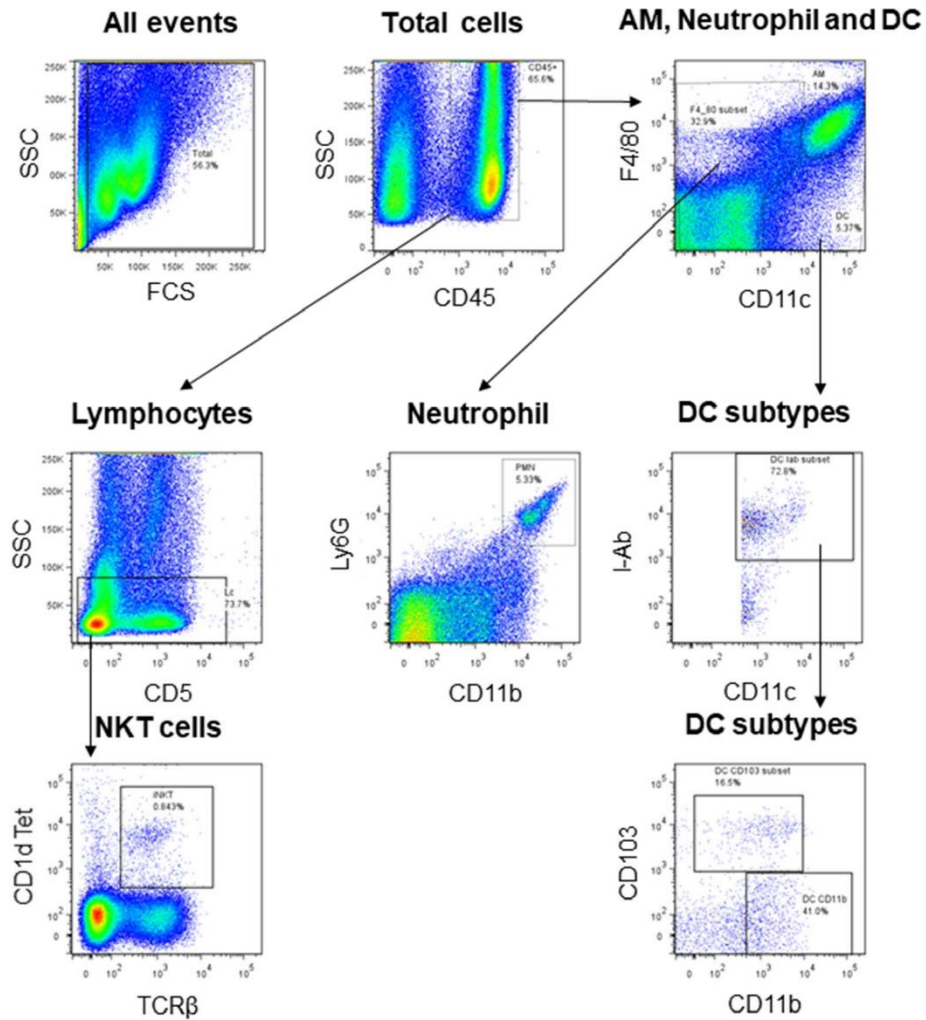

**Supplementary Figure 2: Lack of staining was obtained with the isotype control.** Lung sections were evaluated by immunohistochemistry a) with the isotype control for the antibodies against the cytokines and b) with the isotype control for the antibodies against the receptors (magnification x200) on lung collected at 24h after the challenge. These samples were prepared from not infected mice (PBS).

**a)**

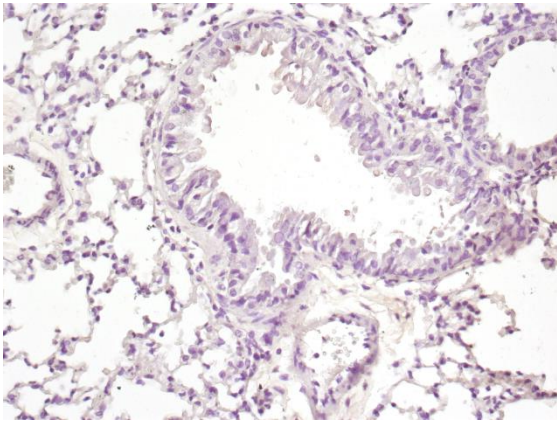

**b)**

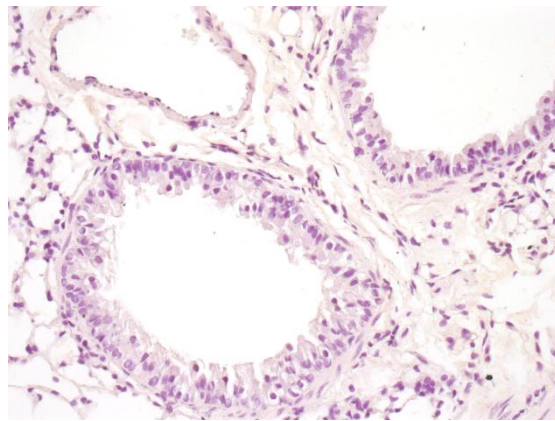

**Supplementary Figure 3: Treatment with the anti-IL-20Rb antibody completely prevent the alveolar wall thickening in mice infected by *Sp*.** We have measured the alveolar wall thickness in control mice (PBS) as well as in mice infected with *Sp* treated or not with the anti-IL-20Rb antibody. Alveolar wall thickening was measured in the peribronchial area by using the software Image J (NIH). We analyzed at least 10 alveolar walls in the lungs of 4 different mice for each group.

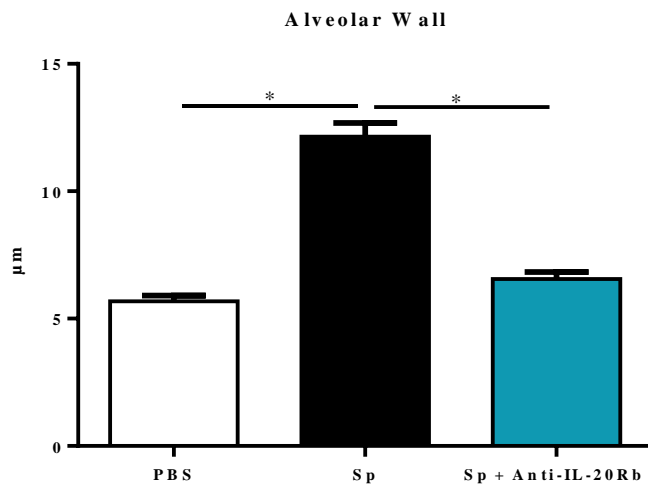

**Supplementary Figure 4 : Anti-IL-20Rb neutralizing antibody did not modulate the production of IL-17 and IL-22.** mRNA level for the cytokines IL-17 and IL-22 were evaluated by RT-qPCR in lung tissue at 24h *p.i.* Results were expressed as fold increase compared to the mice exposed to PBS and using expression of GAPDH as a housekeeping gene. Results were expressed as mean  $\pm$  SEM. There was no significant difference between each group.

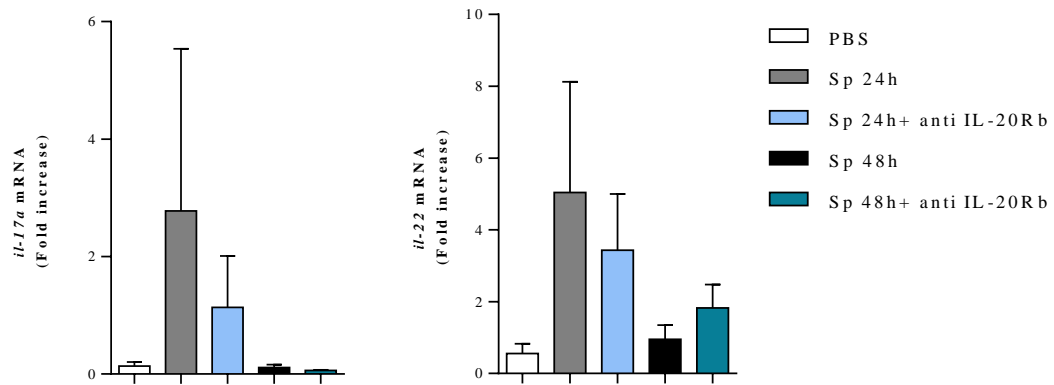

**Supplementary Figure 5 : Anti-IL-20Rb neutralizing antibody did not modulate the production of S100A9** mRNA level for the antimicrobial peptide S100A9 were evaluated by RT-qPCR in lung tissue at 24h *p.i.* Results were expressed as fold increase compared to the mice exposed to PBS and using expression of GAPDH as a housekeeping gene. Results were expressed as mean  $\pm$  SEM. There was no significant difference between each group.

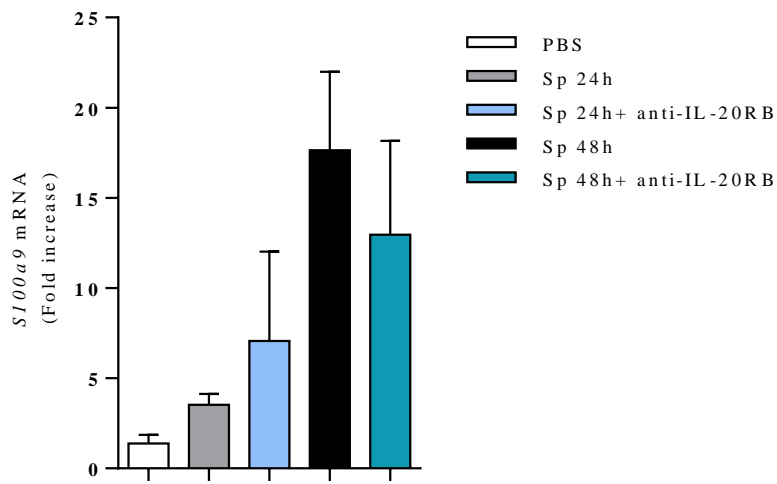



**Supplementary Figure 6: Treatment with the anti-IL-20Rb antibody did not affect the weight loss and the survival in mice infected by *Sp*.** a) the weight was measured during 6 days after the infection and the results were expressed as the percentage of the initial weight. b) the percentage of the surviving mice was reported in the same experiments. The experiment was repeated 2 times with ten mice per group. There was no significant difference between each group.

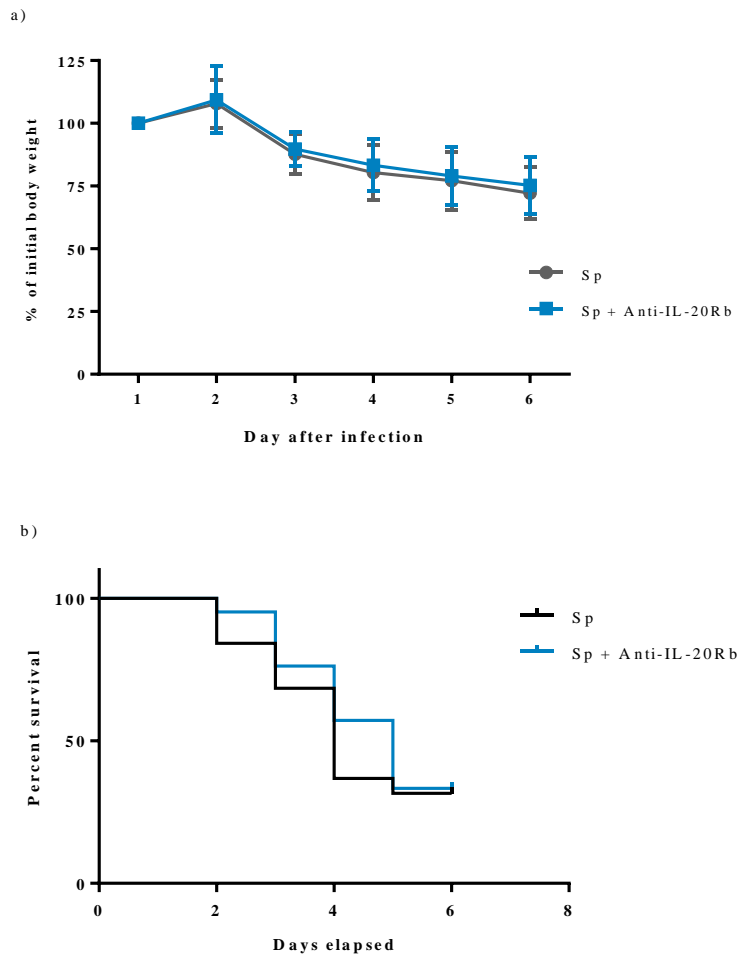

Supplement: mmc1.pdf [file mmc1.pdf]
